# Supplementary material
Source: MDPI journal article supplement (https://www.mdpi.com/2073-8994/14/2/340)
Supplement: s1 [file s1]

# Interface Asymmetry Induced and Surface Pressure Controlled Valence Tautomerism in Monolayers of *bis*-Phthalocyaninates of Lanthanides

Daria S. Kutsybala <sup>1</sup>, Alexander V. Shokurov <sup>1,2</sup>, Alexander G. Martynov <sup>1</sup>, Alexey V. Yagodin <sup>1</sup>, Vladimir V. Arslanov <sup>1</sup>, Yulia G. Gorbunova <sup>1,3,\*</sup> and Sofiya L. Selektor <sup>1,\*</sup>

<sup>1</sup> Frumkin Institute of Physical Chemistry and Electrochemistry of Russian Academy of Sciences, Leninsky pr. 31-4, 119071 Moscow, Russia; dariakutsybala@gmail.com (D.S.K.); dr.shokurov@gmail.com (A.V.S.); martynov.alexandre@gmail.com (A.G.M.); vladimir.arslanov@gmail.com (V.V.A.), sofs@list.ru (S.L.S.)

<sup>2</sup> Enikolopov Institute of Synthetic Polymeric Materials of Russian Academy of Sciences, Profsoyuznaya 70, 117393 Moscow, Russia

<sup>3</sup> Kurnakov Institute of General and Inorganic Chemistry of Russian Academy of Sciences, Leninsky pr. 31, 119071 Moscow, Russia; e-mail@e-mail.com

\* Correspondence: sofs@list.ru (S.L.S.); yulia@igic.ras.ru (Y.G.G.)

## MALDI-TOF mass spectral characterization of lanthanide bisphthalocyaninates ... 2

|                                                                                     |   |
|-------------------------------------------------------------------------------------|---|
| Figure S1. MALDI-TOF mass-spectrum of Sm[(BuO) <sub>8</sub> Pc] <sub>2</sub> .....  | 2 |
| Figure S2. MALDI-TOF mass-spectrum of Er[(BuO) <sub>8</sub> Pc] <sub>2</sub> .....  | 2 |
| Figure S3. MALDI-TOF mass-spectrum of Tm[(BuO) <sub>8</sub> Pc] <sub>2</sub> .....  | 3 |
| Figure S4. MALDI-TOF mass-spectrum of Yb[(BuO) <sub>8</sub> Pc] <sub>2</sub> .....  | 3 |
| Figure S5. MALDI-TOF mass-spectrum of Sm[(15C5) <sub>4</sub> Pc] <sub>2</sub> ..... | 4 |

## MALDI-TOF mass spectral characterization of lanthanide bisphthalocyaninates

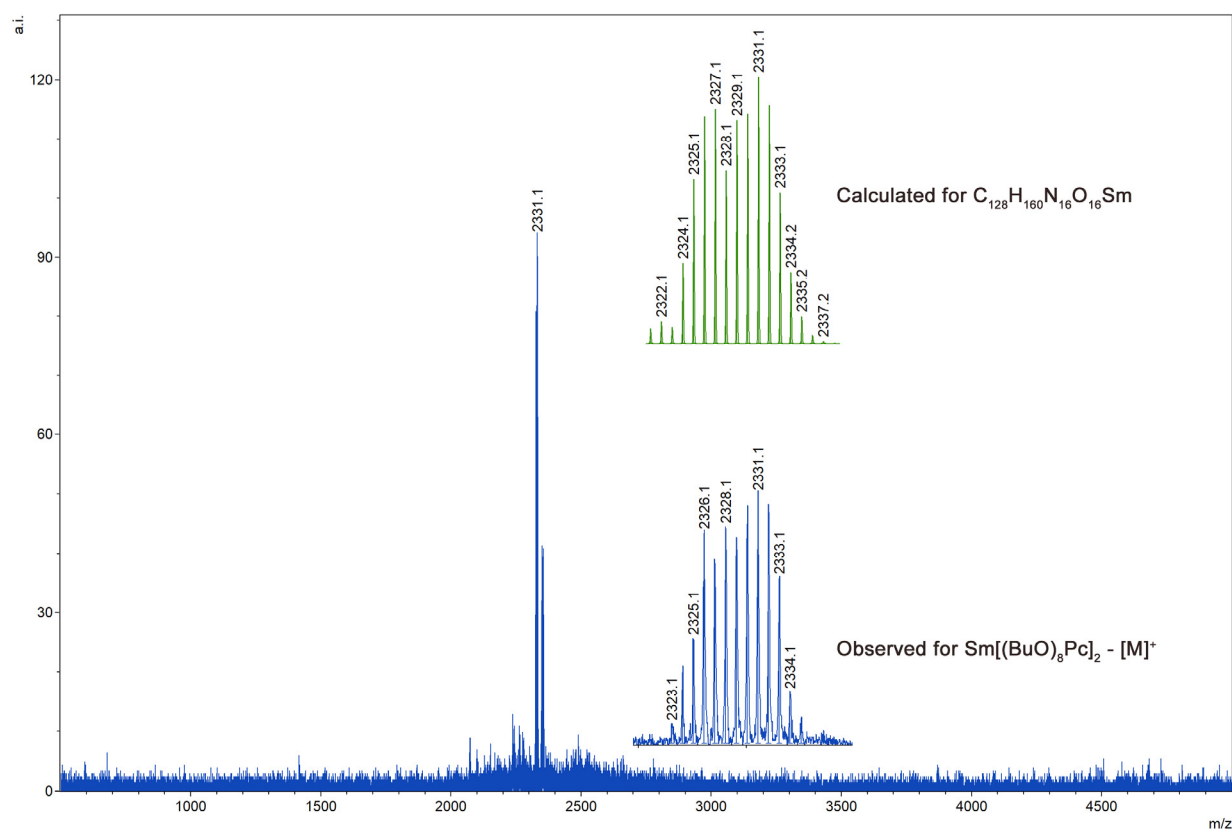

**Figure S1.** MALDI-TOF mass-spectrum of  $\text{Sm}[(\text{BuO})_8\text{Pc}]_2$

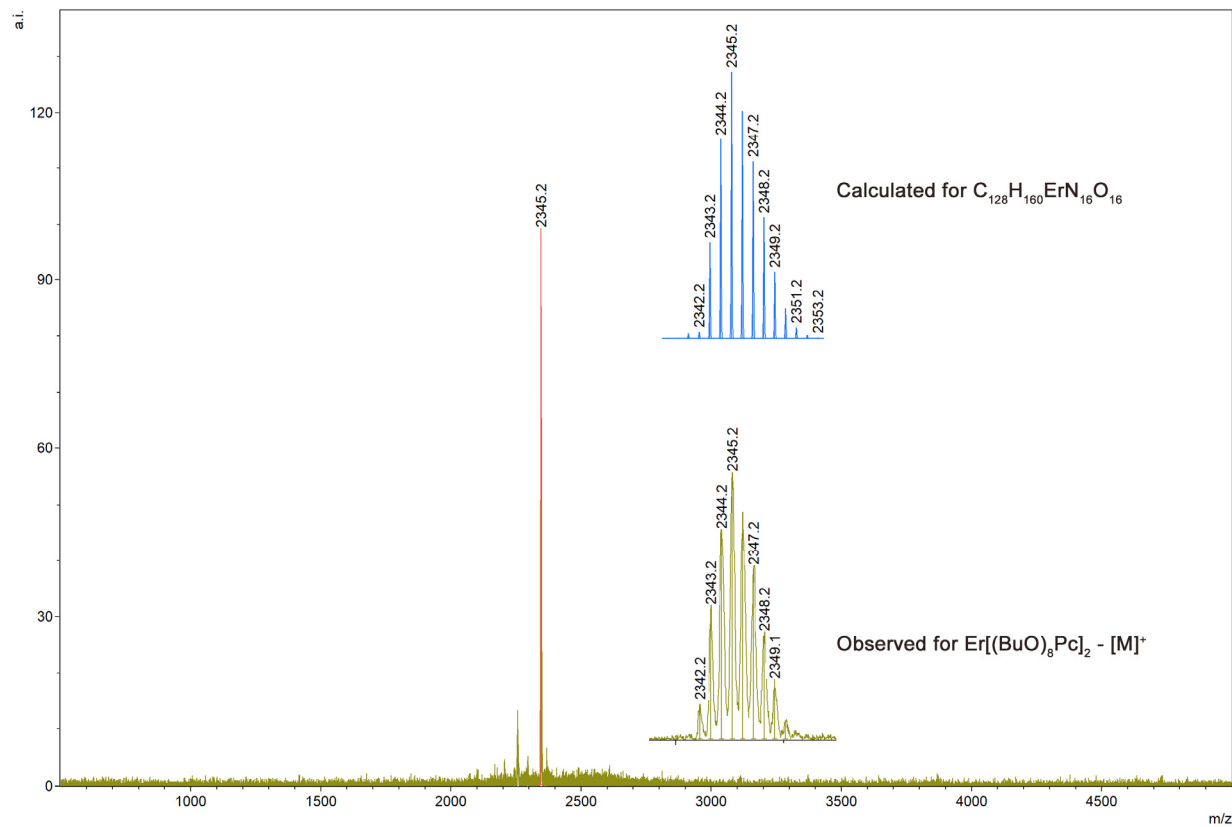

**Figure S2.** MALDI-TOF mass-spectrum of  $\text{Er}[(\text{BuO})_8\text{Pc}]_2$

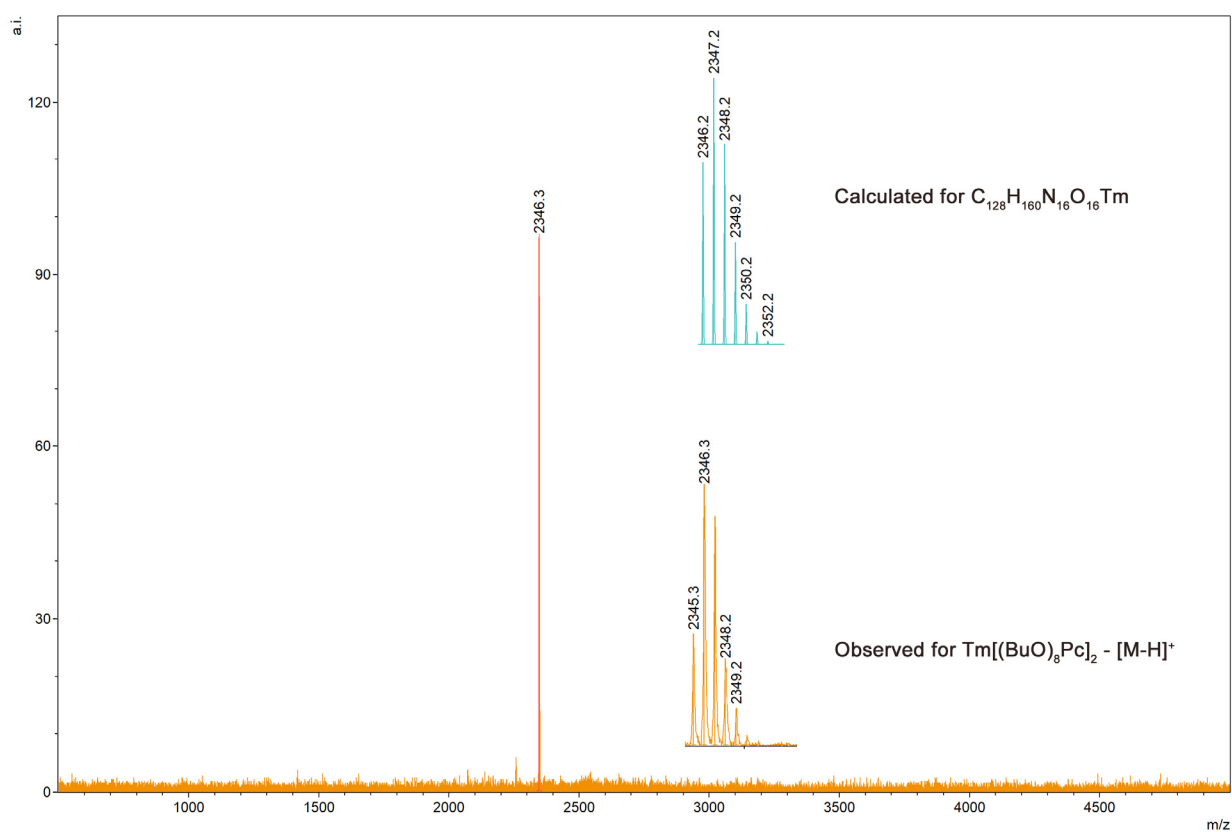

**Figure S3.** MALDI-TOF mass-spectrum of  $Tm[(BuO)_8Pc]_2$

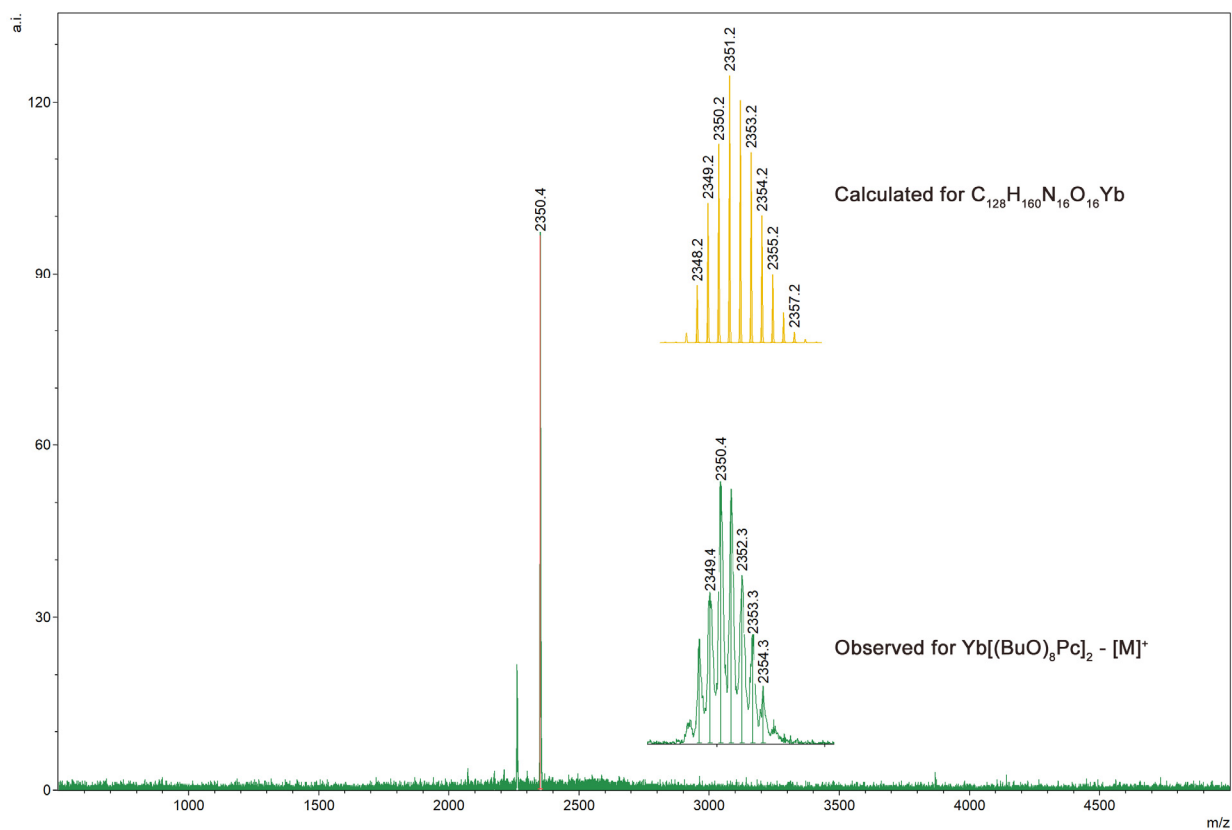

**Figure S4.** MALDI-TOF mass-spectrum of  $Yb[(BuO)_8Pc]_2$

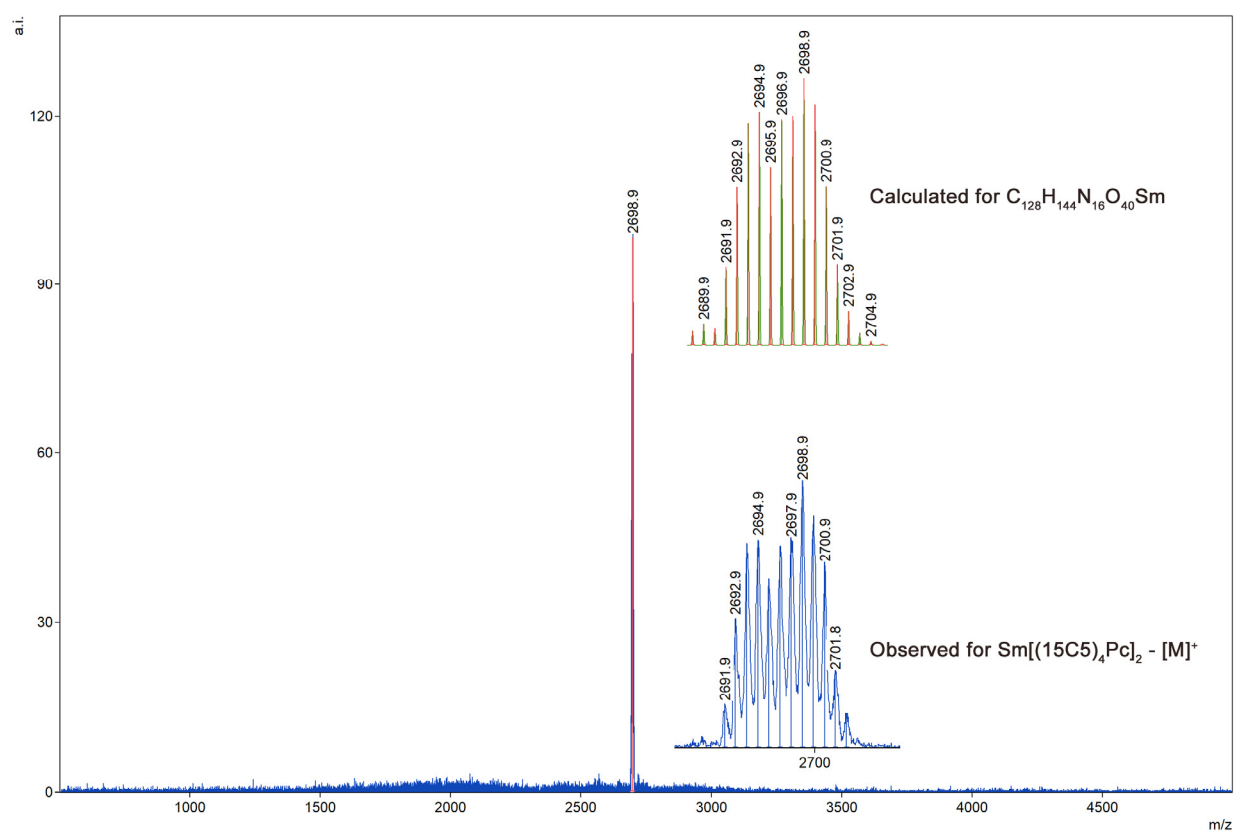

**Figure S5.** MALDI-TOF mass-spectrum of  $Sm[(15C5)_4Pc]_2$
